# Supplementary material
Source: publisher figshare collection journal article supplement (https://acs.figshare.com/ndownloader/files/10149321)
Supplement: Supplementary file 1 [file 10149321]

**Nature and Value of Freely-Dissolved EPS Ecosystem Services: Insight into Molecular  
Coupling Mechanisms for Regulating Metal Toxicity**

Weijun Shou, Fuxing Kang\*, and , and Jiahao Lu

College of Resources and Environmental Sciences, Nanjing Agricultural University, Jiangsu 210095,  
China

Pages 3, figures 0, and tables 2

Manuscript prepared for *Environmental Science & Technology*

November 22, 2017

**Table S1.** Fitted parameters related to the extra- and intracellular distribution of metals in the absence and presence of freely dissolved EPS. Here, the distribution coefficient  $K_d$  (L/10<sup>6</sup> cells) was calculated as the ratio of  $q$  versus  $C_w$  for each datum.

| <b>Metals</b>    | <b>EPS manipulation</b> | <b><i>n</i></b> | <b><math>K_F</math></b> | <b><math>K_d</math></b> | <b><math>R^2</math></b> |
|------------------|-------------------------|-----------------|-------------------------|-------------------------|-------------------------|
| Cu <sup>2+</sup> | No EPS                  | 0.99            | 0.11                    | 0.10–0.11               | 0.97                    |
|                  | EPS                     | 0.93            | 0.04                    | 0.03–0.05               | 0.99                    |
| Cd <sup>2+</sup> | No EPS                  | 0.81            | 0.26                    | 0.08–0.15               | 0.98                    |
|                  | EPS                     | 0.71            | 0.35                    | 0.03                    | 0.96                    |

**Table S2.** Fitted parameters related to the coordination of metal with freely dissolved EPS on the basis of fluorescence microtitrimetry, calculated by equation 2 in the Materials and Methods section ( $n$ : number of binding sites;  $\log K_A$ : association constant;  $p$ : probability;  $R^2$ : correlation coefficient).

| <b>Metals</b>    | <b>EPS</b>           | <b><math>n</math></b> | <b><math>\log K_A</math></b> | <b><math>p</math></b> | <b><math>R^2</math></b> |
|------------------|----------------------|-----------------------|------------------------------|-----------------------|-------------------------|
| Ca <sup>2+</sup> | freely dissolved EPS | 0.91                  | 1.39                         | 0.03                  | 0.93                    |
| Zn <sup>2+</sup> | freely dissolved EPS | 0.94                  | 2.16                         | <0.01                 | 0.94                    |
| Al <sup>3+</sup> | freely dissolved EPS | 0.95                  | 2.78                         | <0.01                 | 0.97                    |
| Cd <sup>2+</sup> | freely dissolved EPS | 0.99                  | 3.34                         | 0.02                  | 0.92                    |
| Cu <sup>2+</sup> | freely dissolved EPS | 0.93                  | 3.70                         | <0.01                 | 0.98                    |
| Cr <sup>3+</sup> | freely dissolved EPS | 0.98                  | 4.15                         | <0.01                 | 0.98                    |
